# Supplementary material
Source: Springer Nature journal article supplement (https://www.springermedizin.de/resource/supplementary/12874_2011_789_MOESM2_ESM.pdf/9432646)
Supplement: MOESM2 [file 9432646]

## RESEARCH



- Benefit for all
- Delayed benefit
- Instrumental
  
- Active
- Objective
- Removed
- Scientists
- Patients' rights
- (Perceived as) cold

## CARE



- Benefit for individual
- Immediate and direct
- Person-centred  
(processual)
- Passive
- Subjective
- Empathic
- Clinicians, caregivers
- Shared responsibilities
- (Perceived as) warm
